# Supplementary material for: Characterization and Biological Activity of Fiber-Type Cannabis sativa L. Aerial Parts at Different Growth Stages
Source: MDPI journal article supplement (doi:10.3390/plants11030419), 2022-02-03
Supplement: s1 [file s1]

## Supplementary materials

### Characterization and biological activity of fiber-type *Cannabis sativa* L. aerial parts at different growth stages

Giulia Mastellone <sup>1,†</sup>, Arianna Marengo <sup>1,†</sup>, Barbara Sgorbini <sup>1</sup>, Federica Scaglia <sup>1</sup>, Francesca Capetti <sup>1</sup>, Francesco Gai <sup>2</sup>, Pier Giorgio Peiretti <sup>2</sup>, Patrizia Rubiolo <sup>1</sup>, Cecilia Cagliero <sup>1,\*</sup>

<sup>1</sup> Department of Drug Science and Technology, University of Turin, I-10125, Turin, Italy; giulia.mastellone@unito.it, arianna.marengo@unito.it, barbara.sgorbini@unito.it, federica.scaglia@edu.unito.it, francesca.capetti@unito.it, patrizia.rubiolo@unito.it

<sup>2</sup> Institute of Sciences of Food Production, National Research Council, 10095, Grugliasco, Italy; francesco.gai@ispa.cnr.it, piergiorgio.peiretti@ispa.cnr.it

<sup>†</sup> Both authors contributed equally to this work

<sup>\*</sup> Correspondence: cecilia.cagliero@unito.it; Tel.: +39 011 6707133

**Table S1.** Variables considered in the experimental design (2<sup>n</sup> screening study).

| Variable                      | Low value | High value |
|-------------------------------|-----------|------------|
| Sample amount (mg)            | 100       | 500        |
| Volume of solvent (mL)        | 5         | 50         |
| Water in the solvent (%)      | 0         | 50         |
| Extraction time with US (min) | 10        | 30         |

**Table S2.** Quality analytical parameters of the HPLC-UV method.

| Compound                 | $\lambda$<br>(nm) | Linear<br>range<br>(mg/L) | R <sup>2</sup> | Calibration curve<br>equation | Peak quantified                   |
|--------------------------|-------------------|---------------------------|----------------|-------------------------------|-----------------------------------|
| Luteolin-7-O-glucuronide | 346/252           | 25-150                    | 0.9989         | y = 14487x - 24394            | 1                                 |
| Apigenin-7-O-glucuronide | 336/266           | 10-350                    | 0.9986         | y = 20488x + 47085            | 2                                 |
| Apigenin                 | 336/266           | 0.1-25                    | 0.9989         | y = 35166x - 2365.2           | 9                                 |
| Diosmetin                | 343/252           | 0.1-25                    | 0.9970         | y = 37180x - 1940.9           | 3, 4, 10                          |
| Acacetin                 | 267/334           | 1-25                      | 0.9990         | y = 32388x + 9461.5           | 5, 8                              |
| Coumaric acid            | 310               | 1-10                      | 0.9950         | y = 50388x + 22980            | 15                                |
| CBDA                     | 220/270/310       | 5-50                      | 0.9999         | y = 13839x - 21.947           | 20, 21, 22, 23, 24,<br>25, 26, 27 |

**Table S3.** Classification of the hemp samples analysed in this study: acronym, growth stage, land plot and drying method.

| Sample | Growth stage    | Land plot <sup>a</sup> | Drying method              |
|--------|-----------------|------------------------|----------------------------|
| 1A_OD  | Mid vegetative  | A                      | Oven-drying <sup>b</sup>   |
| 2A_OD  | Late vegetative | A                      | Oven-drying                |
| 3A_OD  | Shooting        | A                      | Oven-drying                |
| 4A_OD  | Early flower    | A                      | Oven-drying                |
| 1B_OD  | Mid vegetative  | B                      | Oven-drying                |
| 2B_OD  | Late vegetative | B                      | Oven-drying                |
| 3B_OD  | Shooting        | B                      | Oven-drying                |
| 4B_OD  | Early flower    | B                      | Oven-drying                |
| 1C_OD  | Mid vegetative  | C                      | Oven-drying                |
| 2C_OD  | Late vegetative | C                      | Oven-drying                |
| 3C_OD  | Shooting        | C                      | Oven-drying                |
| 4C_OD  | Early flower    | C                      | Oven-drying                |
| 1A_FD  | Mid vegetative  | A                      | Freeze-drying <sup>c</sup> |
| 2A_FD  | Late vegetative | A                      | Freeze-drying              |
| 3A_FD  | Shooting        | A                      | Freeze-drying              |
| 4A_FD  | Early flower    | A                      | Freeze-drying              |
| 1B_FD  | Mid vegetative  | B                      | Freeze-drying              |
| 2B_FD  | Late vegetative | B                      | Freeze-drying              |
| 3B_FD  | Shooting        | B                      | Freeze-drying              |
| 4B_FD  | Early flower    | B                      | Freeze-drying              |
| 1C_FD  | Mid vegetative  | C                      | Freeze-drying              |
| 2C_FD  | Late vegetative | C                      | Freeze-drying              |
| 3C_FD  | Shooting        | C                      | Freeze-drying              |
| 4C_FD  | Early flower    | C                      | Freeze-drying              |

<sup>a</sup> 2 m<sup>2</sup> subplots randomly located in 2×12 m<sup>2</sup> plot

<sup>b</sup> Forced-draft oven to constant weight at 65°C

<sup>c</sup> Lyophilizer

**Table S4.** Parameters of the *in-vitro* tyrosinase inhibitory assay.

| Sample                        | Slope | R <sup>2</sup> | Calibration curve equation |
|-------------------------------|-------|----------------|----------------------------|
| Negative control (no extract) | 0.052 | 0.999          | y = 0.052x - 0.0172        |
| Positive control (kojic acid) | 0.025 | 0.999          | y = 0.0255x - 0.0522       |
| MeOH hemp extract             | 0.035 | 1              | y = 0.0348x + 0.0241       |
| Acetone hemp extract          | 0.032 | 1              | y = 0.032x + 0.0345        |

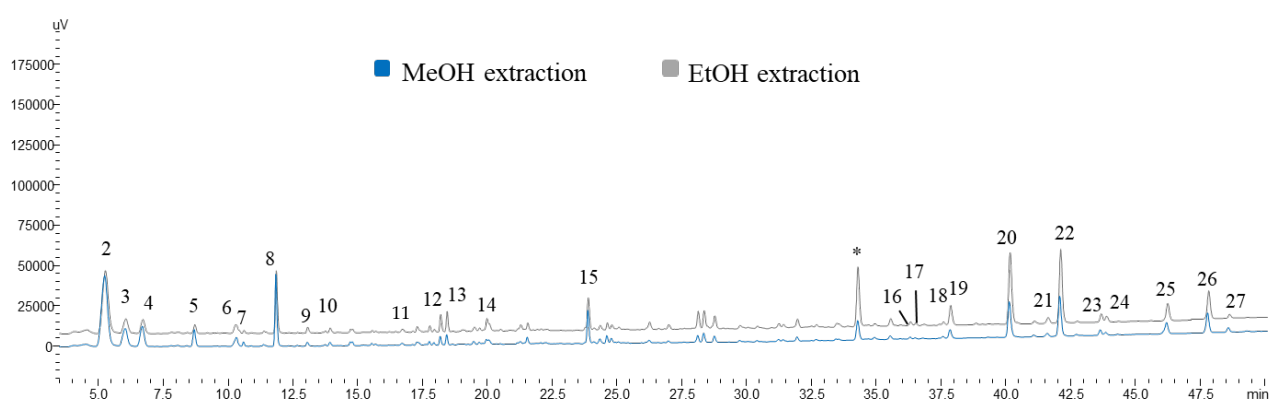

**Figure S1.** Chromatographic profile at 254 nm of methanolic and ethanolic extraction of fiber-type *Cannabis sativa* L. aerial parts at 5 mg/mL. For peaks identification, see Table 1.

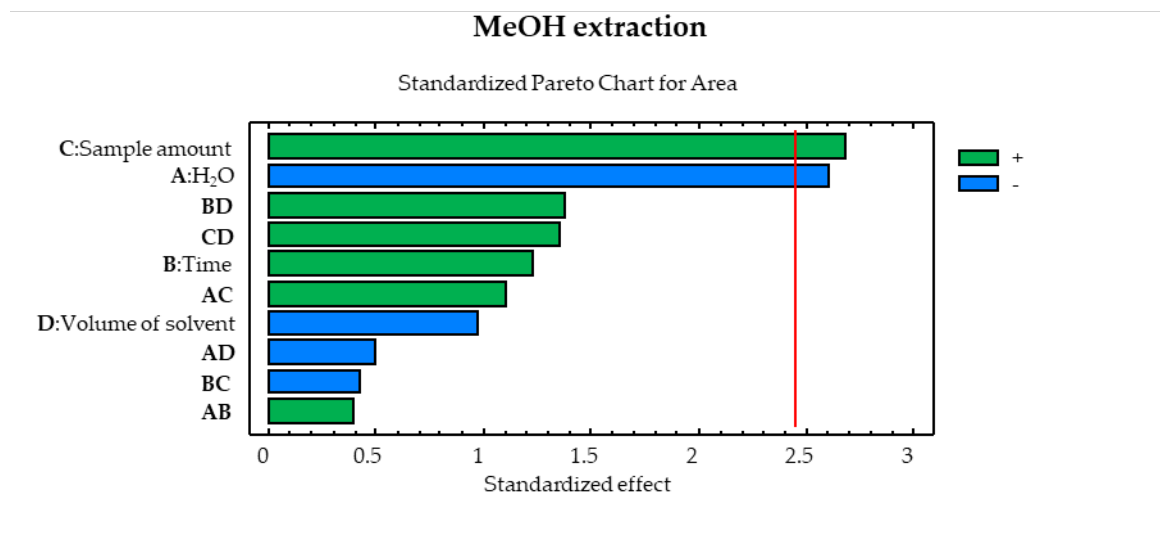

(a)

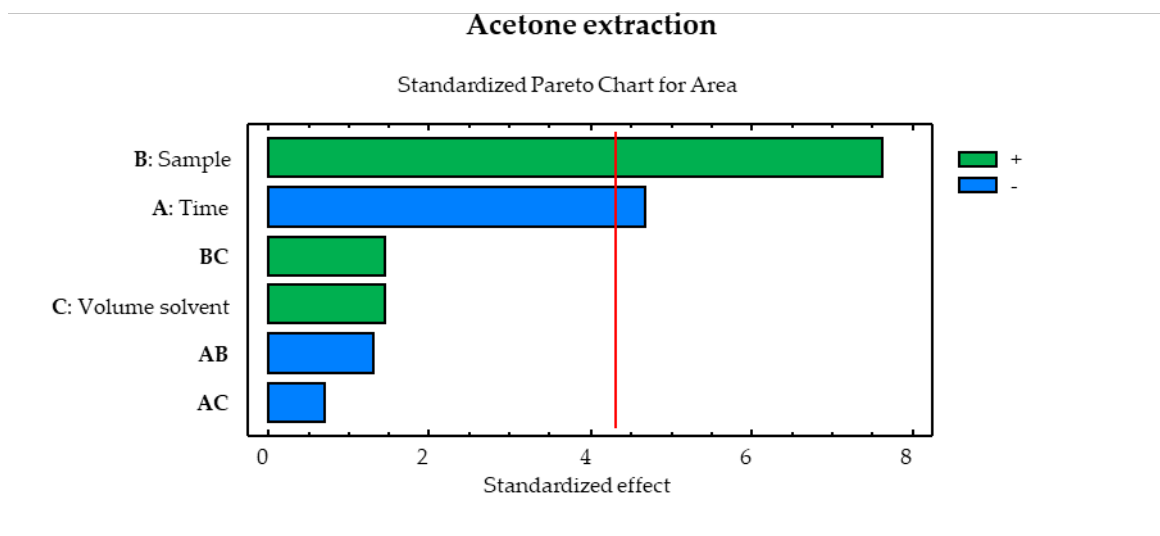

(b)

**Figure S2.** Pareto charts obtained in the screening of the main variables for the methanolic (a) and acetone extraction (b).

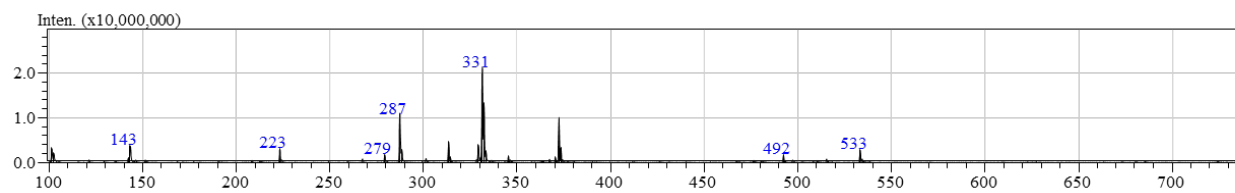

(a)

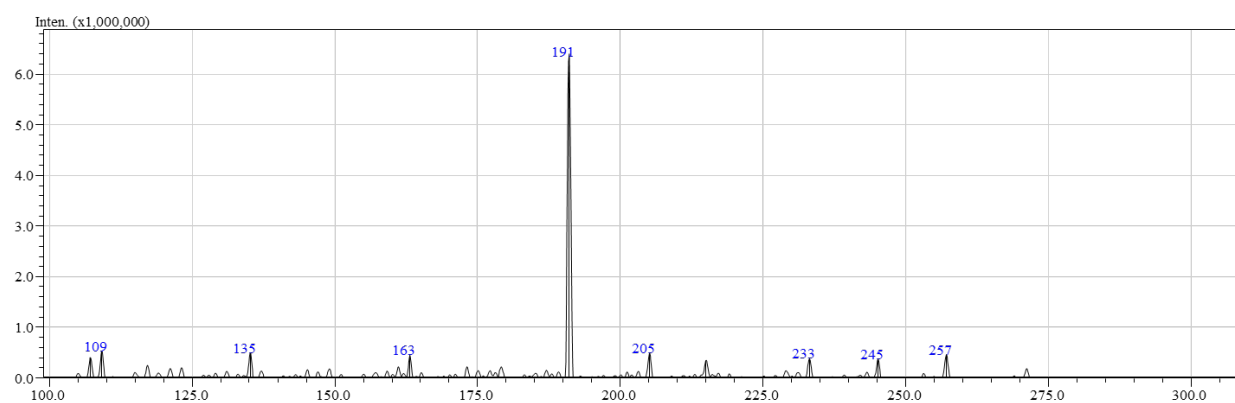

(b)

**Figure S3.** Representative MS spectrum of peak 21 in ESI+ (a) and PIS fragmentation (b) of pseudomolecular ion 331m/z (putatively identified as varinic acid derivative according to [32]).

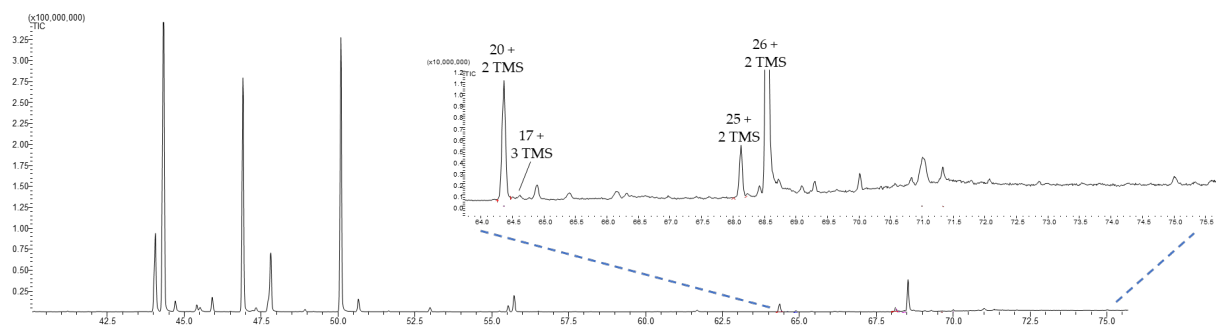

(a)

Peak 20 + 2 TMS

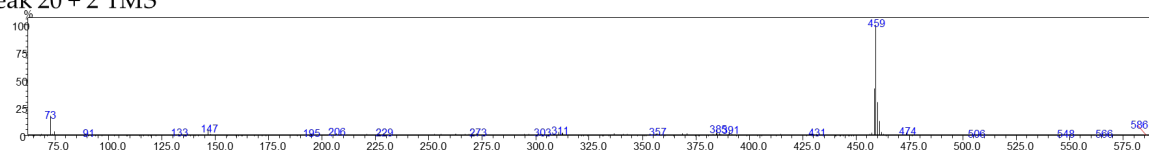

Peak 25 + 2 TMS

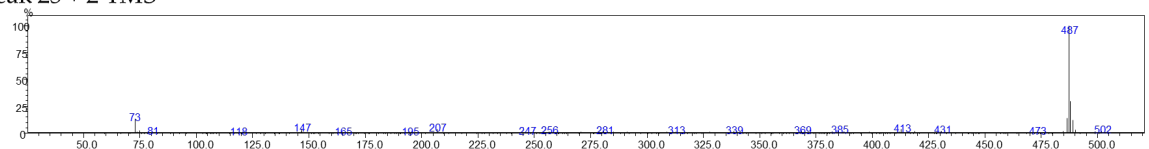

Peak 17 + 3 TMS

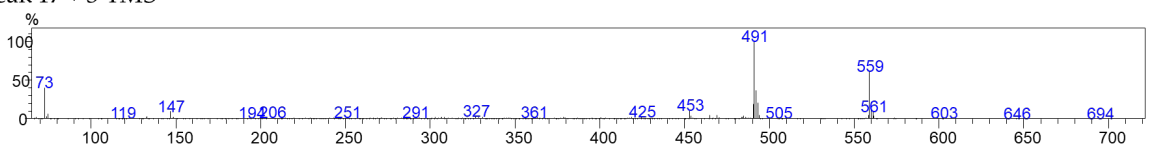

Peak 26 + 2 TMS

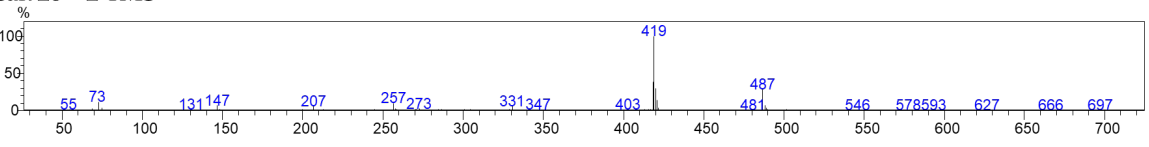

(b)

**Figure S4.** GC-MS profile of the FD acetone hemp extract, after derivatization with BSTFA (a) and MS spectra of selected peak in the hemp extract (b). TMS (trimethylsilyl). See table 1 for peak numbers.

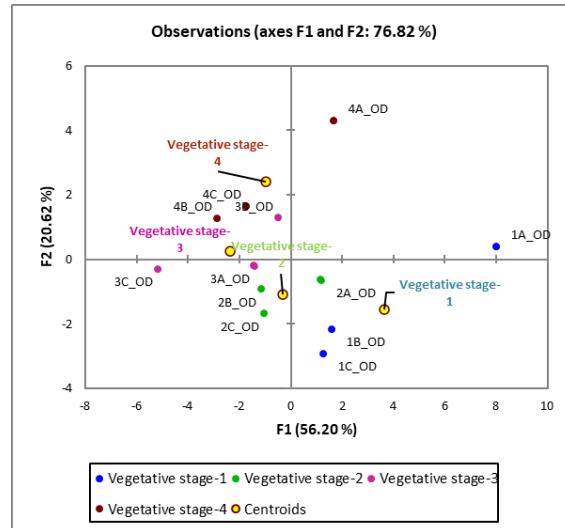

(a)

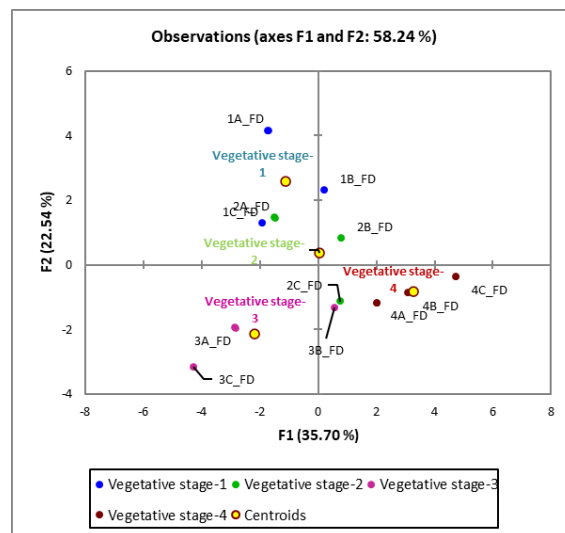

(b)

**Figure S5.** PCA elaboration of oven-dried (a) and freeze-dried (b) hemp samples, according to the growth stages.

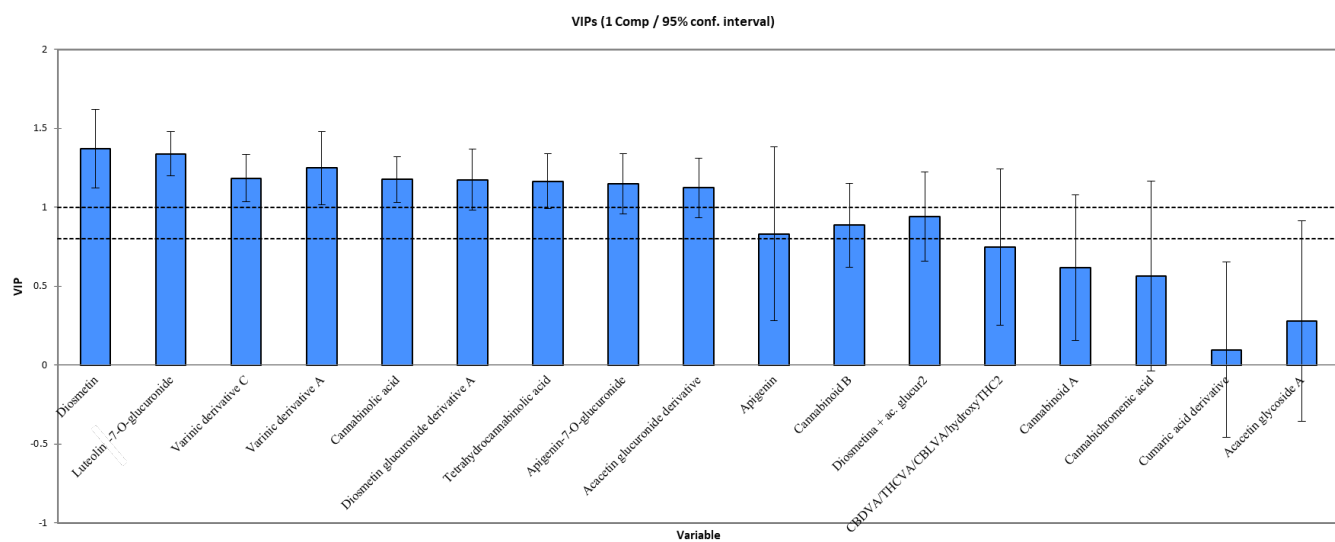

**Figure S6.** Variables importance in the projection (VIP) for the discrimination of oven-dried and freeze-dried samples.



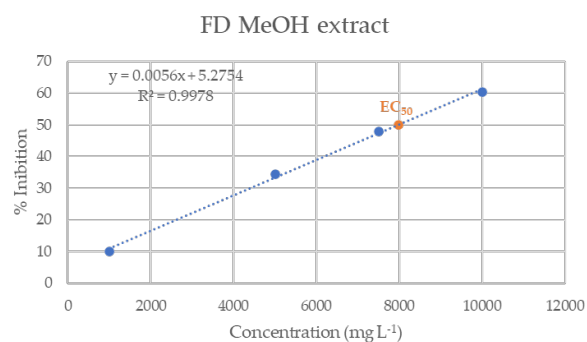

(a)

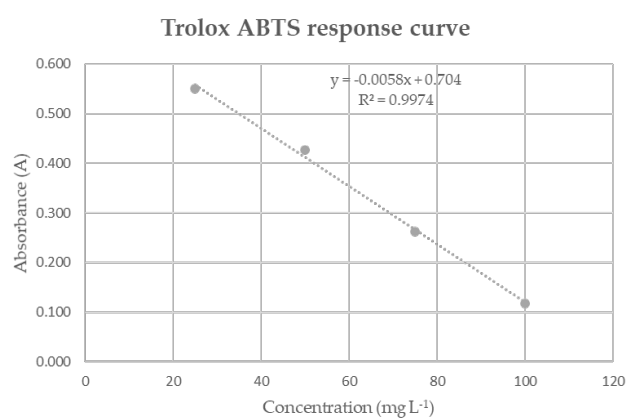

(b)

**Figure S7.** Representative response curve of FD MeOH extract (a) and Trolox (b), used to measure the scavenging effect on DPPH• and ABTS• radicals, respectively.

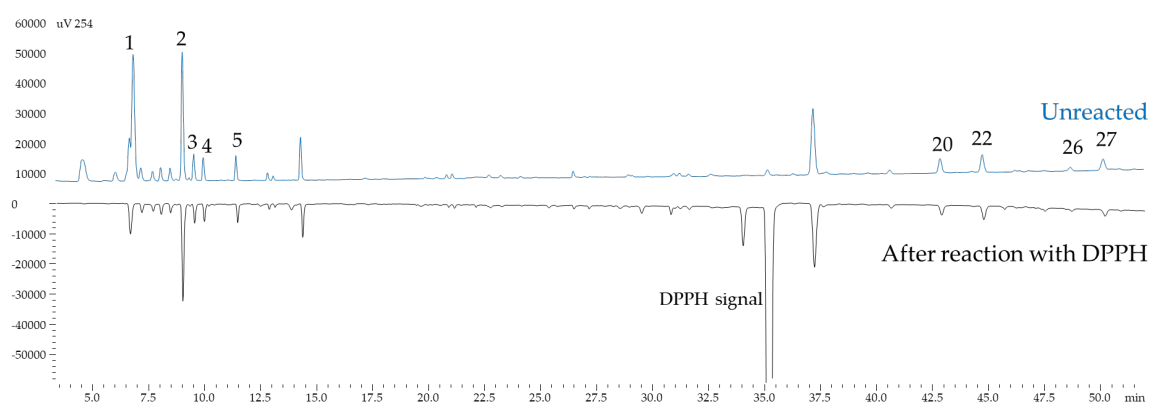

(a)

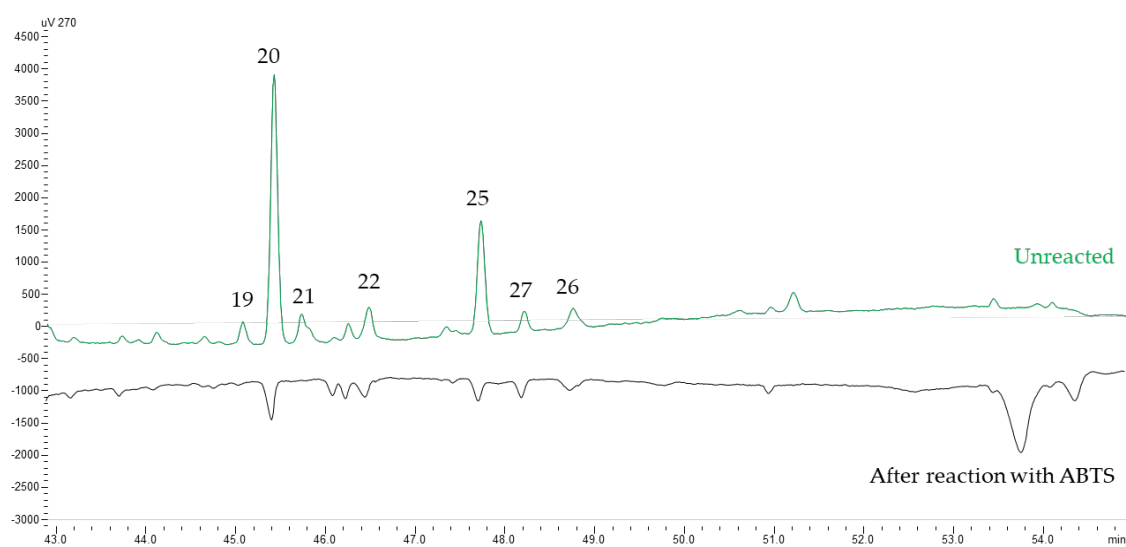

(b)

**Figure S8.** Representative chromatogram of FD MeOH hemp profile before and after the reaction with DPPH• radicals on C18 column (a) and FD acetone hemp profile before and after the reaction with ABTS•• on RP-Amide column (b).
